# Supplementary material
Source: PubMed Central journal article supplement (PMC7392388)
Supplement: NIHMS1564846-supplement-1.pdf [file NIHMS1564846-supplement-1.pdf]

**Supplemental Table 1. List of grade 3-4 chronic conditions included in the CCSS categorization matrix, stratified by organ system. Grade 5 conditions are deaths, so no further definition provided.**

| <b>Chronic Condition</b>     | <b>Grade 3 Definition</b>                                                                                                                     | <b>Grade 4 Definition</b>                                                                             |
|------------------------------|-----------------------------------------------------------------------------------------------------------------------------------------------|-------------------------------------------------------------------------------------------------------|
| <b><u>Cardiovascular</u></b> |                                                                                                                                               |                                                                                                       |
| Coronary artery disease      | Myocardial infarction, angina, or coronary heart disease not requiring cardiac catheterization but on anti-anginal medication                 | Myocardial infarction requiring cardiac catheterization, angioplasty, or coronary artery bypass graft |
| Heart failure                | Congestive heart failure, requiring medication                                                                                                | Heart transplant                                                                                      |
| Arrhythmia                   | Arrhythmia, requiring pacemaker                                                                                                               | Ventricular fibrillation/flutter                                                                      |
| Valvular heart disease       | Not applicable                                                                                                                                | Heart valve replacement                                                                               |
| Stroke                       | Occlusion of cerebral arteries                                                                                                                | Stroke/cerebrovascular accident                                                                       |
| Pericardial disease          | Pericardial disease requiring surgical intervention                                                                                           | Not applicable                                                                                        |
| Other cardiac conditions     | Thromboangiitis obliterans (Buerger disease)<br>Hypotension, unspecified<br>Other chronic pulmonary heart disease                             | Not applicable                                                                                        |
| Thromboembolic disease       | Blood clot in head, lung, arm, leg, or pelvis, not otherwise specified                                                                        | Pulmonary embolism and infarction<br>Embolism and thrombosis of unspecified artery                    |
| Other vascular conditions    | Aorta-subclavian-carotid bypass<br>Other (peripheral) vascular shunt or bypass<br>Other repair of aneurysm<br>Repair of arteriovenous fistula | Other excision of vessels, aorta, abdominal (aorta)                                                   |
| Hypertension                 | Hypertensive chronic kidney disease<br>Hypertensive heart disease                                                                             | Not applicable                                                                                        |
| <b><u>Endocrine</u></b>      |                                                                                                                                               |                                                                                                       |
| Thyroid nodules              | Thyroid nodules, requiring surgery                                                                                                            | Not applicable                                                                                        |
| Diabetes                     | Diabetes, requiring insulin                                                                                                                   | Not applicable                                                                                        |
| Gonadal dysfunction          | Postablative ovarian failure or testicular hypofunction<br>Premature menopause, onset <40 years of age<br>Female infertility<br>Azoospermia   | Not applicable                                                                                        |
| Other hormone conditions     | Panhypopituitarism<br>Diabetes insipidus<br>Corticoadrenal hormone insufficiency<br>Glucocorticoid deficiency                                 | Not applicable                                                                                        |
| <b><u>Pulmonary</u></b>      |                                                                                                                                               |                                                                                                       |

| <b>Chronic Condition</b>       | <b>Grade 3 Definition</b>                                                                                                                                                                                                                                                                                                                                                                                                                                                                                                                                                                                          | <b>Grade 4 Definition</b>                                                         |
|--------------------------------|--------------------------------------------------------------------------------------------------------------------------------------------------------------------------------------------------------------------------------------------------------------------------------------------------------------------------------------------------------------------------------------------------------------------------------------------------------------------------------------------------------------------------------------------------------------------------------------------------------------------|-----------------------------------------------------------------------------------|
| Emphysema                      | Emphysema, requiring medication                                                                                                                                                                                                                                                                                                                                                                                                                                                                                                                                                                                    | Not applicable                                                                    |
| Pulmonary fibrosis             | Requiring oxygen therapy                                                                                                                                                                                                                                                                                                                                                                                                                                                                                                                                                                                           | Not applicable                                                                    |
| Other respiratory conditions   | Primary pulmonary hypertension                                                                                                                                                                                                                                                                                                                                                                                                                                                                                                                                                                                     | Chronic respiratory failure<br>Respiratory arrest<br>Respirator dependency status |
| <b><u>Musculoskeletal</u></b>  |                                                                                                                                                                                                                                                                                                                                                                                                                                                                                                                                                                                                                    |                                                                                   |
| Amputation                     | Total ostectomy, femur<br>Disarticulation of elbow<br>Amputation through humerus, upper arm amputation<br>Disarticulation of shoulder<br>Interthoracoscapular amputation, forequarter amputation<br>Disarticulation of knee<br>Amputation above knee, amputation of leg through femur, amputation of thigh<br>Disarticulation of hip<br>Abdominopelvic amputation, hemipelvectomy, hindquarter amputation<br>Lower leg or ankle reattachment, reattachment of leg not otherwise specified<br>Traumatic amputation of arm and hand, unilateral, at or above elbow<br>Upper limb amputation<br>Lower limb amputation | Not applicable                                                                    |
| Joint replacement              | Major joint replacement                                                                                                                                                                                                                                                                                                                                                                                                                                                                                                                                                                                            | Not applicable                                                                    |
| <b><u>Neurologic</u></b>       |                                                                                                                                                                                                                                                                                                                                                                                                                                                                                                                                                                                                                    |                                                                                   |
| Balance                        | Problems with balance or ability to manipulate objects, severe                                                                                                                                                                                                                                                                                                                                                                                                                                                                                                                                                     | Problems with balance or ability to manipulate objects, disabling                 |
| Paralysis                      | Disorders of accessory (11 <sup>th</sup> ) nerve                                                                                                                                                                                                                                                                                                                                                                                                                                                                                                                                                                   | Hemiplegia; quadriplegia                                                          |
| Other neurologic conditions    | Intracranial ventricular shunt or anastomosis<br>Ventricular shunt to abdominal cavity or organs<br>Irrigation and exploration of ventricular shunt<br>Replacement of ventricular shunt<br>Multiple sclerosis<br>Difficulty in walking                                                                                                                                                                                                                                                                                                                                                                             | Coma                                                                              |
| <b><u>Gastrointestinal</u></b> |                                                                                                                                                                                                                                                                                                                                                                                                                                                                                                                                                                                                                    |                                                                                   |
| Hepatitis                      | Cirrhosis                                                                                                                                                                                                                                                                                                                                                                                                                                                                                                                                                                                                          | Liver transplant                                                                  |

| <b>Chronic Condition</b>          | <b>Grade 3 Definition</b>                                                                            | <b>Grade 4 Definition</b>                                       |
|-----------------------------------|------------------------------------------------------------------------------------------------------|-----------------------------------------------------------------|
| Intestinal obstruction            | Surgery for intestinal obstruction                                                                   | Not applicable                                                  |
| <b><u>Hearing</u></b>             |                                                                                                      |                                                                 |
| Loss of hearing                   | Hearing loss, requiring a hearing aid<br>Deafness in one ear not completely corrected by hearing aid | Deafness in both ears not completely corrected by hearing aid   |
| <b><u>Renal</u></b>               |                                                                                                      |                                                                 |
| Renal failure                     | Not applicable                                                                                       | Dialysis or kidney transplant                                   |
| Urinary incontinence              | Neurogenic bladder                                                                                   | Not applicable                                                  |
| Other renal conditions            | Nephrotic syndrome with unspecified pathologic lesion in kidney                                      | Rupture of bladder, nontraumatic                                |
| <b><u>Vision and eye</u></b>      |                                                                                                      |                                                                 |
| Cataracts                         | Cataracts, requiring surgery                                                                         | Not applicable                                                  |
| Blindness                         | Legally blind in only one eye                                                                        | Legally blind in both eyes or loss of an eye                    |
| <b><u>Secondary neoplasms</u></b> |                                                                                                      |                                                                 |
|                                   | Thyroid carcinoma<br>Benign meningiomas requiring resection<br>Lobular cancer in situ of the breast  | Invasive malignancies<br>Ductal carcinoma in situ of the breast |

## Supplemental Methods: Grading the Severity of Chronic Health Conditions

In 2000, Oeffinger et al introduced the concept of using the Common Toxicity Criteria (CTCv2) to grade late effects of cancer therapy.<sup>1</sup> At that time, there was not a commonly used tool that was widely accepted for grading the severity of chronic health conditions following cancer therapy, or what are commonly referred to as late effects. Instead, most studies simply reported prevalence or incidence rates of a specific condition, without regard to the level of seriousness of the condition. The CTC was originally created by leaders in the Cancer Therapy Evaluation Program (CTEP) at the National Cancer Institute (NCI) as a tool to measure acute toxicity of cancer therapy.

In 1998, when the NCI released CTCv2, the Radiation Therapy Oncology Group (RTOG) / European Organization for Research and Treatment of Cancer (EORTC) Late Radiation Morbidity Scoring Scheme was incorporated into the instrument.<sup>2</sup> As noted in the CTCv2 manual, adverse events (toxicity) could be graded by level of severity:

- Grade 0 = no adverse event or within normal limits
- Grade 1 = mild adverse event
- Grade 2 = moderate adverse event
- Grade 3 = severe and undesirable adverse event
- Grade 4 = life-threatening or disabling adverse event
- Grade 5 = death related to adverse event

An important distinction was made between grade 1-2 conditions and grade 3-4 conditions, with the latter requiring a major intervention or substantially altering the activities of daily living (ADL). This tool was then incorporated into all new NCI-sponsored protocols and its use became ubiquitous among the oncology community.

As noted by Oeffinger et al,<sup>1</sup> “although CTCv2 was not developed specifically for use in grading late effects, the majority of late effects can be scored easily for the various organ systems or the appended Late Radiation Morbidity Scoring Scheme.” Many late outcomes following cancer therapy were listed in CTCv2, including left ventricular dysfunction and hypothyroidism. Other conditions could be adapted to this scoring system, such as chronic hepatitis C. This work was presented at the 1999 Annual Cancer Survivorship: Research Challenges and Opportunities for the New Millennium Conference sponsored by the NCI.

Subsequently, the NCI created a multi-disciplinary group to help develop version 3, with a name change to the Common Terminology Criteria for Adverse Events (CTCAEv3). An overarching goal of CTCAEv3 was to provide a tool that provided a framework to grade acute and long-term toxicity for cancer patients / survivors, regardless of age at cancer diagnosis. Using this new rubric, Oeffinger et al graded the severity of 137 chronic health conditions among 10,397 childhood cancer survivors and 3034 siblings participating in the Childhood Cancer Survivor Study (CCSS). Many of the chronic conditions were self-reported. The exceptions were second or subsequent neoplasms, which were confirmed by pathology report or medical records, or fatal conditions, that were determined by linkage to the National Death Index. Thus, as described by the authors, to avoid overestimating the severity of outcomes, an algorithm was used that incorporated self-reported medications (e.g., antihypertensives, estrogen replacement, etc), surgical interventions (e.g., angioplasty, kidney transplant, etc.), or life-sustaining interventions

(e.g., home oxygen therapy). The majority of conditions were captured from specific questions, such as “Have you ever been told by a doctor or other health care professional that you have, or have had ... a myocardial infarction (heart attack)” with response options including ‘no’, ‘yes’, ‘non sure’, and ‘if yes, age at first occurrence’. In each of the organ systems, participants were also asked if they had ‘any other problems’ and a text box was provided. A trained nosologist assigned an ICD9 code for each condition. Then, a team of 9 clinicians / researchers adjudicated the inclusion/exclusion of each condition and the severity assigned for chronic health conditions. If there was not enough information to distinguish between grades, the lower score was selected. For instance, due to the lack of information, the severity of cognitive dysfunction was not well captured and so were usually graded = 1 (mild); the results substantially underestimated the severity of this important outcome among survivors of CNS tumors. This was intentional, as a goal of the authors, as stated above, was to avoid overestimating the burden of morbidity among this population. The full grading schema was provided in Appendix E of the *New England Journal of Medicine* publication.<sup>3</sup>

The following year, investigators from the Netherlands reported the late outcomes among 1362 long-term survivors treated at Emma Children’s Hospital over a 30-year period.<sup>4</sup> With respect to grading the severity of late outcomes, Geenen et al also used CTCAEv3 and independently arrived at a scoring schema that was essentially the same as that of the CCSS investigators. Also of note, while 94.3% of the Dutch cohort had a medical evaluation, their findings largely mirrored those of the CCSS that depended upon self-reported outcomes.<sup>5</sup>

In 2009, NCI released CTCAEv4 with a subsequent minor update CTCAEv4.03.<sup>6</sup> The number of adverse events and the level of detail to score the events was expanded in these new versions. As highlighted in the manual, the grades for events followed these general guidelines:

- Grade 1 = Mild; asymptomatic or mild symptoms; clinical or diagnostic observations only; intervention not indicated.
- Grade 2 = Moderate; minimal, local or noninvasive intervention indicated; limiting age-appropriate instrumental ADL.
- Grade 3 = Severe or medically significant but not immediately life-threatening; hospitalization or prolongation of hospitalization indicated; disabling; limiting self-care ADL.
- Grade 4 = Life-threatening consequences; urgent intervention indicated.
- Grade 5 = Death related to adverse event.

Software to convert from CTCAEv3 to CTCAEv4 (and CTCAEv4.03) was provided by the NCI. Investigators from the CCSS used this software and updated their scoring matrix. This updated matrix was then used to grade the severity of outcomes among 14,359 long-term survivors in the CCSS and to report on the aging of the cohort.

In 2017, Hudson et al expanded on this effort of using CTCAEv4.03 and modified the scoring schema for long-term survivors seen for a medical evaluation.<sup>7</sup> Figure 2 in this paper provided the details for scoring of all conditions observed in the St. Jude Lifetime Cohort Study. Also in 2017, Oeffinger assisted investigators from the British CCSS in grading the severity of adverse outcomes of 14,836 long-term survivors of childhood cancer.<sup>8</sup> Then, a risk stratification tool, based upon treatment exposures, was applied to a subgroup of 2844 survivors of acute

lymphoblastic leukemia and was determined to have strong discriminatory characteristics in predicting long-term outcomes.

With each new CCSS survey conducted among the cohort, the CCSS Chronic Condition Matrix has been updated. Prior to the current study by Gibson et al, a 9-person multi-disciplinary team led by Oeffinger reviewed and adjudicated all conditions graded and scored for the 23,601 long-term survivors diagnosed over a three-decade period and 5,051 siblings. The focus on this paper is on grade 3-5 conditions; the scoring matrix for these conditions is provided in Supplemental Table 1.

#### REFERENCES:

1. Oeffinger KC, Eshelman DA, Tomlinson GE, et al. Grading of late effects in young adult survivors of childhood cancer followed in an ambulatory adult setting. *Cancer* 2000; **88**(7):1687-95.
2. Common Toxicity Criteria, version 2:  
[https://ctep.cancer.gov/protocolDevelopment/electronic\\_applications/docs/ctcmanual\\_v4\\_10-4-99.pdf](https://ctep.cancer.gov/protocolDevelopment/electronic_applications/docs/ctcmanual_v4_10-4-99.pdf)
3. [https://www.nejm.org/doi/suppl/10.1056/NEJMsa060185/suppl\\_file/nejm\\_oeffinger\\_sa1.pdf](https://www.nejm.org/doi/suppl/10.1056/NEJMsa060185/suppl_file/nejm_oeffinger_sa1.pdf)
4. Geenen MM, Cardous-Ubbink MC, Kremer LC, et al. Medical assessment of adverse health outcomes in long-term survivors of childhood cancer. *JAMA* 2007; **297**(24):2705-15.
5. Oeffinger KC, Robison LL. Childhood cancer survivors, late effects, and a new model for understanding survivorship. *JAMA* 2007; **297**(24): 2762-4.
6. Common Terminology Criteria of Adverse Events, version 4.03:  
[https://www.eortc.be/services/doc/ctc/CTCAE\\_4.03\\_2010-06-14\\_QuickReference\\_5x7.pdf](https://www.eortc.be/services/doc/ctc/CTCAE_4.03_2010-06-14_QuickReference_5x7.pdf)
7. Hudson MM, Ehrhardt MJ, Bhakta N, et al. Approach for classification and severity grading of long-term and late-onset health events among childhood cancer survivors in the St. Jude Lifetime Cohort. *Cancer Epidemiol Biomarkers Prev* 2017; **26**(5):666-674.
8. Frobisher C, Glaser A, Levitt GA, et al. Risk stratification of childhood cancer survivors necessary for evidence-based clinical long-term follow-up. *Br J Cancer* 2017; **117**(11):1723-1731.

**Supplemental Figure 1. Consort diagram of 5-year survivors of adolescent and early young adult cancer and matched cohort of survivors diagnosed in childhood in the Childhood Cancer Survivors Study.**

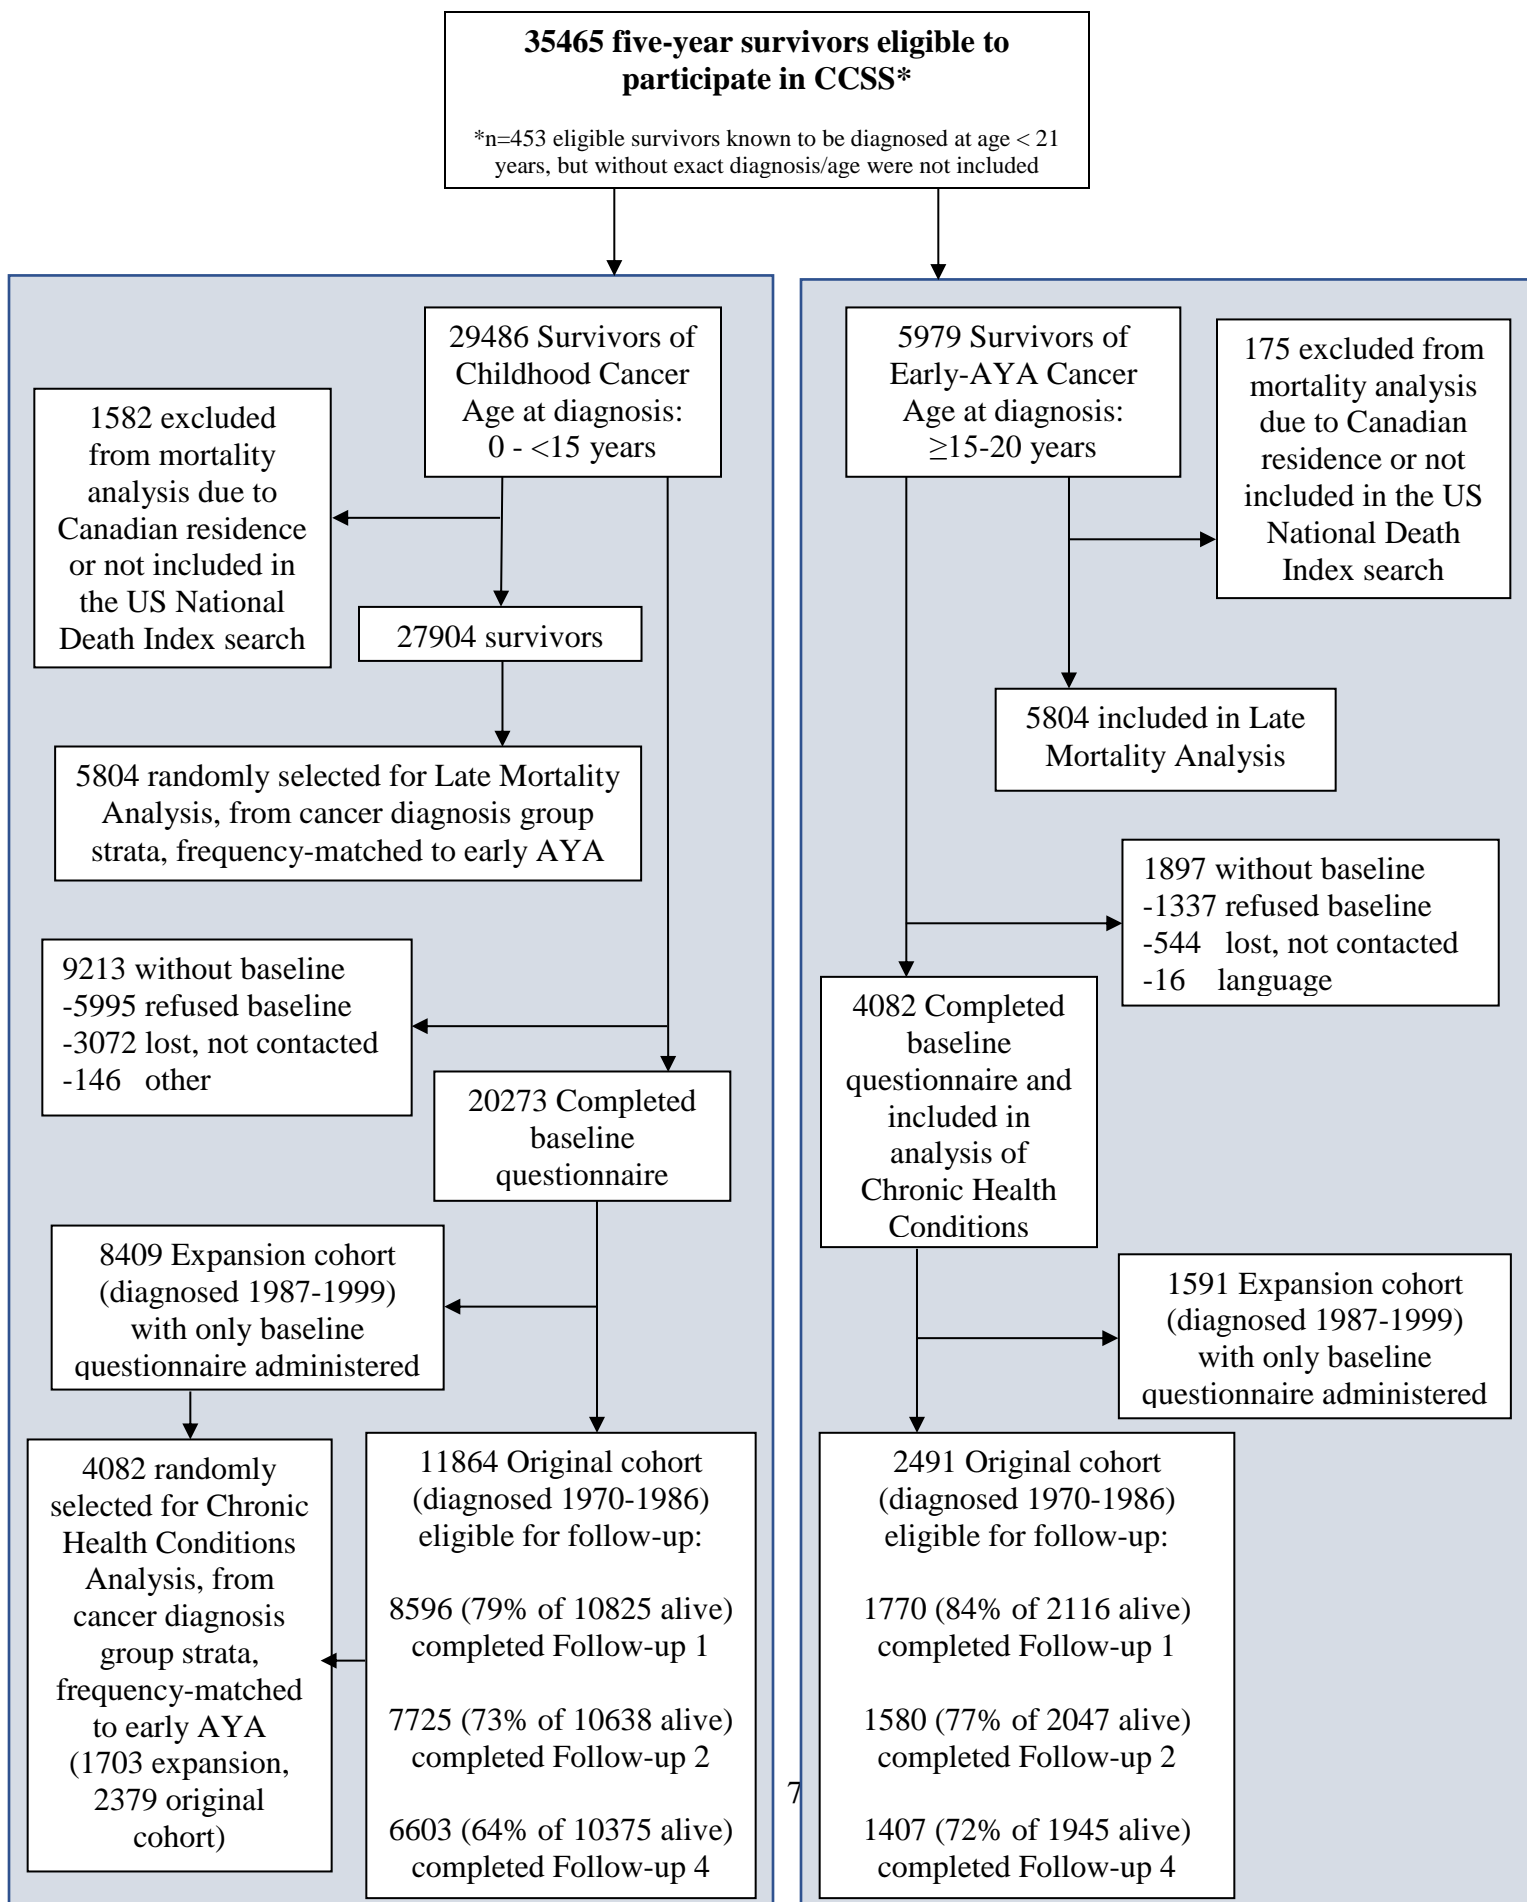

**Supplemental Figure 2. Distribution of the number of early-AYA and childhood cancer survivors by A) maximum attained ages and B) years since diagnosis.**

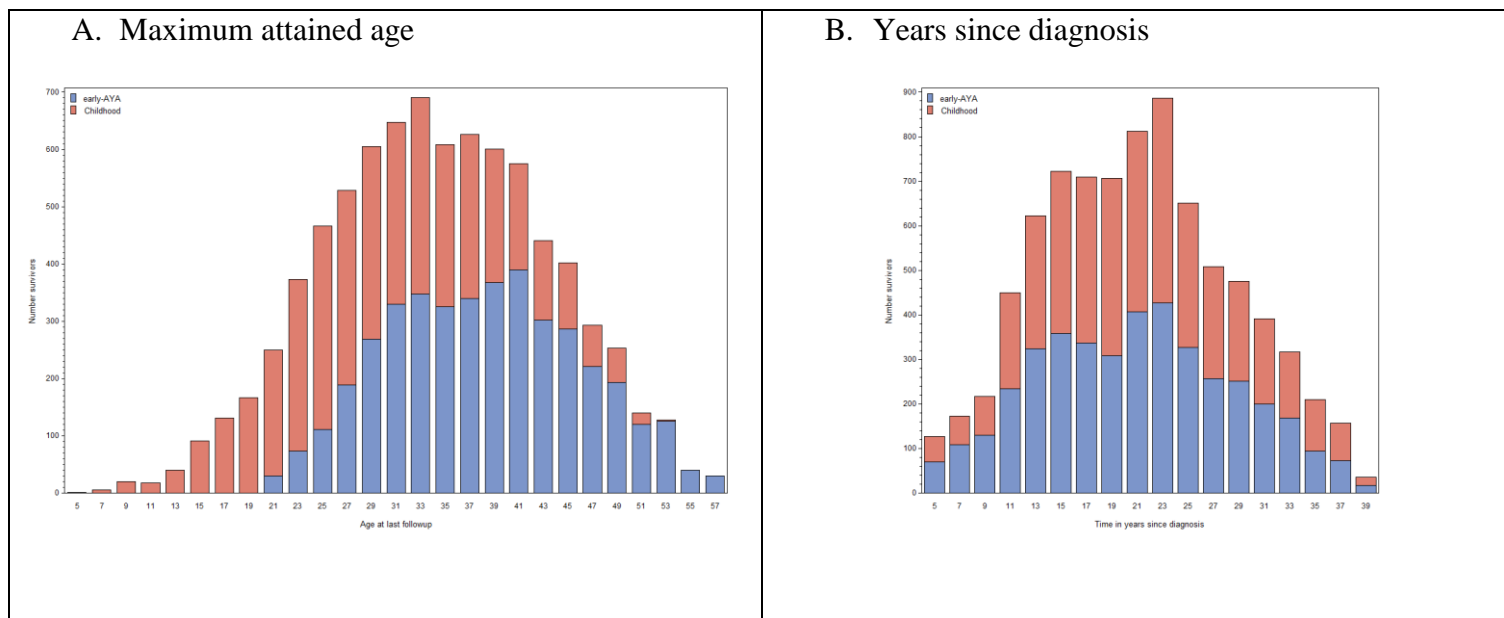



**Supplemental Table 2. Standardized mortality ratios and frequency of death among survivors of early-AYA and matched childhood cancer.**

| Cause of death                | Group                                      | Level  | early-AYA |            |                |                 | Childhood |            |               |                 | p-value |
|-------------------------------|--------------------------------------------|--------|-----------|------------|----------------|-----------------|-----------|------------|---------------|-----------------|---------|
|                               |                                            |        | # deaths  | # expected | Rate / 1000 PY | SMR (95% CI)    | # deaths  | # expected | Rate/ 1000 PY | SMR (95% CI)    |         |
| All causes                    | Among all patients                         |        | 1357      | 231.9      | 11.5           | 5.9(5.5-6.2)    | 963       | 155.7      | 7.5           | 6.2(5.8-6.6)    | 0.22    |
|                               | Sex                                        | Male   | 791       | 163.0      | 12.2           | 4.9(4.5-5.2)    | 563       | 115.3      | 7.6           | 4.9(4.5-5.3)    | 0.91    |
|                               |                                            | Female | 566       | 68.9       | 10.7           | 8.2(7.5-9.0)    | 400       | 40.5       | 7.5           | 9.9(8.9-11.0)   | 0.0084  |
|                               | Survival after diagnosis, y                | 05-9   | 462       | 33.7       | 16.5           | 13.7(12.5-15.0) | 269       | 20.2       | 8.9           | 13.3(11.6-15.2) | 0.70    |
|                               |                                            | 10-19  | 383       | 68.6       | 7.9            | 5.6(5.1-6.2)    | 311       | 54.3       | 5.8           | 5.7(5.1-6.4)    | 0.75    |
|                               |                                            | 20-29  | 292       | 74.1       | 9.7            | 3.9(3.5-4.4)    | 206       | 47.0       | 6.5           | 4.4(3.8-5.0)    | 0.26    |
|                               |                                            | 30+    | 219       | 55.5       | 19.6           | 3.9(3.5-4.5)    | 177       | 34.2       | 14.4          | 5.2(4.5-6.0)    | 0.0072  |
|                               | Current age, y                             | 05-19  | NA        | NA         | NA             |                 | 266       | 20.6       | 7.3           | 12.9(11.3-14.8) | NA      |
|                               |                                            | 20-29  | 569       | 51.1       | 13.6           | 11.1(10.2-12.1) | 296       | 56.2       | 6.0           | 5.3(4.7-5.9)    | <0.0001 |
|                               |                                            | 30-39  | 336       | 69.4       | 7.7            | 4.8(4.3-5.4)    | 205       | 44.0       | 7.0           | 4.7(4.1-5.3)    | 0.66    |
|                               |                                            | 40+    | 452       | 111.4      | 14.0           | 4.1(3.7-4.5)    | 196       | 34.9       | 15.8          | 5.6(4.9-6.5)    | <0.001  |
|                               | 5-9 y after diagnosis, current age 5-19    |        | NA        | NA         | NA             | NA              | 202       | 11.8       | 9.0           | 17.1(14.6-20.0) | NA      |
|                               | 10-19 y after diagnosis, current age 5-19  |        | NA        | NA         | NA             | NA              | 64        | 8.8        | 4.6           | 7.3(5.6-9.5)    | NA      |
|                               | 5-9 y after diagnosis, current age 20-39   |        | 462       | 33.7       | 16.5           | 13.7(12.5-15.0) | 66        | 8.4        | 8.5           | 7.9(6.2-10.1)   | <0.0001 |
|                               | 10-19 y after diagnosis, current age 20-39 |        | 382       | 68.2       | 7.9            | 5.6(5.1-6.2)    | 248       | 45.5       | 6.3           | 5.4(4.8-6.2)    | 0.72    |
|                               | 20+ y after diagnosis, current age 20-39   |        | 60        | 18.6       | 6.6            | 3.2(2.5-4.2)    | 187       | 46.3       | 5.9           | 4.0(3.5-4.7)    | 0.14    |
|                               | 10-19 y after diagnosis, current age 40+   |        | 1         | 0.4        | 5.1            | 2.5(0.3-17.3)   | 0         | NA         | NA            | NA              | NA      |
|                               | 20+ y after diagnosis, current age 40+     |        | 451       | 111.0      | 14.1           | 4.1(3.7-4.5)    | 196       | 34.9       | 15.8          | 5.6(4.9-6.5)    | 0.00017 |
| Subsequent malignant neoplasm | Among all patients                         |        | 323       | 41.5       | 2.7            | 7.8(7.0-8.7)    | 221       | 18.6       | 1.7           | 11.9(10.4-13.6) | <0.0001 |

|                |                                            |        | early-AYA |            |                |                 | Childhood |            |               |                 |         |
|----------------|--------------------------------------------|--------|-----------|------------|----------------|-----------------|-----------|------------|---------------|-----------------|---------|
| Cause of death | Group                                      | Level  | # deaths  | # expected | Rate / 1000 PY | SMR (95% CI)    | # deaths  | # expected | Rate/ 1000 PY | SMR (95% CI)    | p-value |
|                | Sex                                        | Male   | 153       | 22.4       | 2.4            | 6.8(5.8-8.0)    | 116       | 10.3       | 1.6           | 11.3(9.4-13.5)  | <0.0001 |
|                |                                            | Female | 170       | 19.1       | 3.2            | 8.9(7.7-10.4)   | 105       | 8.3        | 2.0           | 12.6(10.4-15.4) | 0.0056  |
|                | Survival after diagnosis, y                | 05-9   | 45        | 2.4        | 1.6            | 18.6(13.9-24.9) | 41        | 1.3        | 1.4           | 31.8(23.4-43.2) | 0.013   |
|                |                                            | 10-19  | 74        | 7.9        | 1.5            | 9.4(7.5-11.8)   | 73        | 3.8        | 1.4           | 19.2(15.2-24.2) | <0.0001 |
|                |                                            | 20-29  | 113       | 15.2       | 3.8            | 7.4(6.2-8.9)    | 44        | 6.0        | 1.4           | 7.4(5.5-9.9)    | 0.95    |
|                |                                            | 30+    | 91        | 16.0       | 8.2            | 5.7(4.6-7.0)    | 63        | 7.5        | 5.1           | 8.4(6.5-10.7)   | 0.019   |
|                | Current age, y                             | 05-19  | NA        | NA         | NA             | NA              | 39        | 1.4        | 1.1           | 29.1(21.2-39.9) | NA      |
|                |                                            | 20-29  | 62        | 4.0        | 1.5            | 15.7(12.2-20.1) | 61        | 3.8        | 1.2           | 16.0(12.5-20.6) | 0.90    |
|                |                                            | 30-39  | 77        | 9.4        | 1.8            | 8.2(6.5-10.2)   | 56        | 5.6        | 1.9           | 9.9(7.6-12.9)   | 0.29    |
|                |                                            | 40+    | 184       | 28.1       | 5.7            | 6.5(5.7-7.6)    | 65        | 7.8        | 5.2           | 8.3(6.5-10.6)   | 0.097   |
|                | 5-9 y after diagnosis, current age 5-19    |        | NA        | NA         | NA             | NA              | 27        | 0.8        | 1.2           | 32.0(22.0-46.7) | NA      |
|                | 10-19 y after diagnosis, current age 5-19  |        | NA        | NA         | NA             | NA              | 12        | 0.5        | 0.9           | 24.2(13.7-42.6) | NA      |
|                | 5-9 y after diagnosis, current age 20-39   |        | 45        | 2.4        | 1.6            | 18.6(13.9-24.9) | 14        | 0.4        | 1.8           | 31.4(18.6-53.0) | 0.086   |
|                | 10-19 y after diagnosis, current age 20-39 |        | 74        | 7.8        | 1.5            | 9.5(7.5-11.9)   | 61        | 3.3        | 1.5           | 18.5(14.3-23.8) | 0.00012 |
|                | 20+ y after diagnosis, current age 20-39   |        | 20        | 3.1        | 2.2            | 6.4(4.1-9.9)    | 42        | 5.7        | 1.3           | 7.4(5.4-10.0)   | 0.60    |
|                | 20+ y after diagnosis, current age 40+     |        | 184       | 28.1       | 5.7            | 6.6(5.7-7.6)    | 65        | 7.8        | 5.2           | 8.3(6.5-10.6)   | 0.10    |
| Cardiac causes | Among all patients                         |        | 141       | 32.3       | 1.2            | 4.4(3.7-5.2)    | 101       | 14.8       | 0.8           | 6.8(5.6-8.3)    | <0.001  |
|                | Sex                                        | Male   | 91        | 24.0       | 1.4            | 3.8(3.1-4.7)    | 60        | 11.0       | 0.8           | 5.5(4.2-7.0)    | 0.030   |
|                |                                            | Female | 50        | 8.3        | 0.9            | 6.0(4.6-7.9)    | 41        | 3.8        | 0.8           | 10.7(7.9-14.5)  | 0.0060  |
|                | Survival after diagnosis, y                | 05-9   | 12        | 1.6        | 0.4            | 7.6(4.3-13.4)   | 7         | 0.6        | 0.2           | 12.0(5.7-25.1)  | 0.34    |
|                |                                            | 10-19  | 49        | 6.4        | 1.0            | 7.7(5.8-10.2)   | 18        | 2.7        | 0.3           | 6.7(4.2-10.6)   | 0.62    |

| Cause of death                    | Group                          | Level  | early-AYA |            |                |                 | Childhood |            |               |                 | p-value |
|-----------------------------------|--------------------------------|--------|-----------|------------|----------------|-----------------|-----------|------------|---------------|-----------------|---------|
|                                   |                                |        | # deaths  | # expected | Rate / 1000 PY | SMR (95% CI)    | # deaths  | # expected | Rate/ 1000 PY | SMR (95% CI)    |         |
|                                   |                                | 20-29  | 41        | 12.7       | 1.4            | 3.2(2.4-4.4)    | 32        | 5.3        | 1.0           | 6.0(4.2-8.5)    | 0.0085  |
|                                   |                                | 30+    | 39        | 11.6       | 3.5            | 3.4(2.5-4.6)    | 44        | 6.2        | 3.6           | 7.1(5.3-9.5)    | <0.001  |
|                                   | Current age, y                 | 05-19  | NA        | NA         | NA             |                 | 11        | 0.6        | 0.3           | 19.6(10.9-35.4) | NA      |
|                                   |                                | 20-29  | 24        | 2.8        | 0.6            | 8.7(5.8-13.0)   | 11        | 2.8        | 0.2           | 3.9(2.2-7.0)    | 0.027   |
|                                   |                                | 30-39  | 42        | 7.9        | 1.0            | 5.3(3.9-7.2)    | 31        | 5.1        | 1.1           | 6.1(4.3-8.7)    | 0.55    |
|                                   |                                | 40+    | 75        | 21.6       | 2.3            | 3.5(2.8-4.3)    | 48        | 6.4        | 3.9           | 7.5(5.7-10.0)   | <0.0001 |
|                                   | 5-9 years post dx, age 5-19    |        | NA        | NA         | NA             | NA              | 7         | 0.3        | 0.3           | 21.7(10.4-45.6) | NA      |
|                                   | 10-19 years post dx, age 5-19  |        | NA        | NA         | NA             | NA              | 4         | 0.2        | 0.3           | 16.7(6.3-44.5)  | NA      |
|                                   | 5-9 years post dx, age 20-39   |        | 12        | 1.6        | 0.4            | 7.6(4.3-13.4)   | 0         | 0.3        | 0.0           | NA              | NA      |
|                                   | 10-19 years post dx, age 20-39 |        | 49        | 6.3        | 1.0            | 7.8(5.9-10.3)   | 14        | 2.4        | 0.4           | 5.7(3.4-9.7)    | 0.32    |
|                                   | 20+ years post dx, age 20-39   |        | 5         | 2.8        | 0.5            | 1.8(0.7-4.3)    | 28        | 5.2        | 0.9           | 5.4(3.7-7.8)    | 0.024   |
|                                   | 20+ years post dx, age 40+     |        | 75        | 21.6       | 2.3            | 3.5(2.8-4.4)    | 48        | 6.4        | 3.9           | 7.5(5.7-10.0)   | <0.0001 |
| Pulmonary causes                  | Among all patients             |        | 58        | 7.9        | 0.5            | 7.4(5.7-9.5)    | 42        | 4.1        | 0.3           | 10.3(7.6-14.0)  | 0.095   |
|                                   | Sex                            | Male   | 36        | 4.7        | 0.6            | 7.8(5.6-10.8)   | 23        | 2.5        | 0.3           | 9.4(6.2-14.1)   | 0.48    |
|                                   |                                | Female | 22        | 3.3        | 0.4            | 6.8(4.5-10.3)   | 19        | 1.6        | 0.4           | 11.8(7.5-18.6)  | 0.078   |
|                                   | Survival after diagnosis, y    | 05-9   | 10        | 0.7        | 0.4            | 15.6(8.4-29.1)  | 6         | 0.4        | 0.2           | 15.2(6.8-33.9)  | 0.96    |
|                                   |                                | 10-19  | 18        | 1.7        | 0.4            | 10.5(6.6-16.7)  | 12        | 1.1        | 0.2           | 11.2(6.3-19.7)  | 0.88    |
|                                   |                                | 20-29  | 11        | 2.6        | 0.4            | 4.3(2.4-7.7)    | 13        | 1.2        | 0.4           | 10.6(6.2-18.3)  | 0.026   |
|                                   |                                | 30+    | 19        | 3.0        | 1.7            | 6.4(4.1-10.0)   | 11        | 1.4        | 0.9           | 8.0(4.4-14.5)   | 0.55    |
|                                   | Current age, y                 | 05-19  | NA        | NA         | NA             | NA              | 10        | 0.4        | 0.3           | 24.0(12.9-44.6) | NA      |
|                                   |                                | 20-29  | 17        | 1.1        | 0.4            | 16.4(10.2-26.3) | 9         | 1.1        | 0.2           | 8.3(4.3-15.9)   | 0.099   |
|                                   |                                | 30-39  | 13        | 1.9        | 0.3            | 7.1(4.1-12.2)   | 7         | 1.2        | 0.2           | 6.0(2.9-12.7)   | 0.74    |
|                                   |                                | 40+    | 28        | 5.0        | 0.9            | 5.6(3.9-8.1)    | 16        | 1.4        | 1.3           | 11.4(7.0-18.7)  | 0.023   |
| Other medical causes <sup>s</sup> | Among all patients             |        | 188       | 67.2       | 1.6            | 2.8(2.4-3.2)    | 141       | 36.9       | 1.1           | 3.8(3.2-4.6)    | 0.0073  |
|                                   | Sex                            | Male   | 101       | 45.6       | 1.6            | 2.2(1.8-2.7)    | 81        | 24.9       | 1.1           | 3.3(2.6-4.2)    | 0.014   |

| Cause of death                     | Group                                     | Level  | early-AYA |            |                |               | Childhood |            |               |                 | p-value |
|------------------------------------|-------------------------------------------|--------|-----------|------------|----------------|---------------|-----------|------------|---------------|-----------------|---------|
|                                    |                                           |        | # deaths  | # expected | Rate / 1000 PY | SMR (95% CI)  | # deaths  | # expected | Rate/ 1000 PY | SMR (95% CI)    |         |
|                                    |                                           | Female | 87        | 21.5       | 1.7            | 4.1(3.3-5.0)  | 60        | 12.0       | 1.1           | 5.0(3.9-6.4)    | 0.22    |
|                                    | Survival after diagnosis, y               | 05-9   | 26        | 6.7        | 0.9            | 3.9(2.6-5.7)  | 14        | 2.8        | 0.5           | 5.0(3.0-8.5)    | 0.44    |
|                                    |                                           | 10-19  | 63        | 20.1       | 1.3            | 3.1(2.5-4.0)  | 34        | 10.8       | 0.6           | 3.1(2.1-4.6)    | 0.96    |
|                                    |                                           | 20-29  | 56        | 23.5       | 1.9            | 2.4(1.8-3.1)  | 57        | 13.0       | 1.8           | 4.4(3.3-5.8)    | 0.0021  |
|                                    |                                           | 30+    | 43        | 16.8       | 3.9            | 2.6(1.9-3.5)  | 37        | 10.3       | 3.0           | 3.6(2.6-5.0)    | 0.13    |
|                                    | Current age, y                            | 05-19  | NA        | NA         | NA             | NA            | 15        | 2.8        | 0.4           | 5.4(3.3-9.0)    | NA      |
|                                    |                                           | 20-29  | 36        | 11.5       | 0.9            | 3.2(2.3-4.4)  | 39        | 11.0       | 0.8           | 3.6(2.4-5.2)    | 0.64    |
|                                    |                                           | 30-39  | 65        | 21.4       | 1.5            | 3.0(2.4-3.9)  | 46        | 12.5       | 1.6           | 3.7(2.8-4.9)    | 0.33    |
|                                    |                                           | 40+    | 87        | 34.3       | 2.7            | 2.5(2.1-3.1)  | 41        | 10.6       | 3.3           | 3.9(2.8-5.2)    | 0.027   |
| Nonrecurrent, Health-related cause | Among all patients                        |        | 711       | 149.0      | 6.0            | 4.8(4.4-5.1)  | 506       | 74.4       | 4.0           | 6.8(6.2-7.4)    | <0.0001 |
|                                    | Sex                                       | Male   | 381       | 96.8       | 5.9            | 3.9(3.6-4.4)  | 280       | 48.6       | 3.8           | 5.8(5.1-6.5)    | <0.0001 |
|                                    |                                           | Female | 330       | 52.2       | 6.3            | 6.3(5.7-7.1)  | 225       | 25.8       | 4.2           | 8.7(7.7-10.0)   | <0.001  |
|                                    | Survival after diagnosis, y               | 05-9   | 94        | 11.4       | 3.4            | 8.2(6.7-10.1) | 68        | 5.1        | 2.3           | 13.5(10.6-17.1) | 0.0019  |
|                                    |                                           | 10-19  | 204       | 36.1       | 4.2            | 5.7(4.9-6.5)  | 137       | 18.4       | 2.6           | 7.4(6.2-8.8)    | 0.016   |
|                                    |                                           | 20-29  | 221       | 54.1       | 7.4            | 4.1(3.6-4.7)  | 146       | 25.6       | 4.6           | 5.7(4.8-6.7)    | 0.0023  |
|                                    |                                           | 30+    | 192       | 47.4       | 17.2           | 4.1(3.5-4.7)  | 155       | 25.4       | 12.6          | 6.1(5.2-7.1)    | <0.001  |
|                                    | Current age, y                            | 05-19  | NA        | NA         | NA             | NA            | 75        | 5.1        | 2.1           | 14.8(11.8-18.6) | NA      |
|                                    |                                           | 20-29  | 140       | 19.3       | 3.3            | 7.3(6.1-8.6)  | 120       | 18.7       | 2.4           | 6.4(5.3-7.8)    | 0.35    |
|                                    |                                           | 30-39  | 197       | 40.6       | 4.5            | 4.9(4.2-5.6)  | 140       | 24.4       | 4.8           | 5.7(4.8-6.8)    | 0.14    |
|                                    |                                           | 40+    | 374       | 89.1       | 11.6           | 4.2(3.8-4.6)  | 170       | 26.2       | 13.7          | 6.5(5.6-7.5)    | <0.0001 |
|                                    | 5-9 y after diagnosis, current age 5-19   |        | NA        | NA         | NA             | NA            | 49        | 3.1        | 2.2           | 15.9(12.0-21.1) | NA      |
|                                    | 10-19 y after diagnosis, current age 5-19 |        | NA        | NA         | NA             | NA            | 26        | 2.0        | 1.9           | 13.1(8.9-19.2)  | NA      |

| Cause of death                           | Group                                      | Level  | early-AYA |            |                |               | Childhood |            |               |               | p-value |
|------------------------------------------|--------------------------------------------|--------|-----------|------------|----------------|---------------|-----------|------------|---------------|---------------|---------|
|                                          |                                            |        | # deaths  | # expected | Rate / 1000 PY | SMR (95% CI)  | # deaths  | # expected | Rate/ 1000 PY | SMR (95% CI)  |         |
|                                          | 5-9 y after diagnosis, current age 20-39   |        | 94        | 11.4       | 3.4            | 8.2(6.7-10.1) | 19        | 2.0        | 2.4           | 9.6(6.1-15.1) | 0.53    |
|                                          | 10-19 y after diagnosis, current age 20-39 |        | 203       | 35.8       | 4.2            | 5.7(4.9-6.5)  | 110       | 16.4       | 2.8           | 6.7(5.5-8.2)  | 0.16    |
|                                          | 20+ y after diagnosis, current age 20-39   |        | 40        | 12.6       | 4.4            | 3.2(2.3-4.3)  | 131       | 24.8       | 4.1           | 5.3(4.4-6.3)  | 0.0054  |
|                                          | 10-19 y after diagnosis, current age 40+   |        | 1         | 0.3        | 5.1            | 3.5(0.5-24.9) | NA        | NA         | NA            | NA            | NA      |
|                                          | 20+ y after diagnosis, current age 40+     |        | 373       | 88.8       | 11.6           | 4.2(3.8-4.7)  | 170       | 26.2       | 13.7          | 6.5(5.6-7.5)  | <0.0001 |
| External causes                          | Among all patients                         |        | 91        | 82.9       | 0.8            | 1.1(0.9-1.3)  | 95        | 81.3       | 0.7           | 1.2(0.9-1.5)  | 0.65    |
|                                          | Sex                                        | Male   | 75        | 66.3       | 1.1            | 1.1(0.9-1.4)  | 67        | 66.6       | 0.9           | 1.0(0.8-1.3)  | 0.50    |
|                                          |                                            | Female | 16        | 16.7       | 0.3            | 1.0(0.6-1.6)  | 29        | 14.7       | 0.5           | 1.9(1.3-3.0)  | 0.032   |
|                                          | Survival after diagnosis, y                | 05-9   | 24        | 22.3       | 0.9            | 1.1(0.7-1.6)  | 13        | 15.2       | 0.4           | 0.9(0.5-1.5)  | 0.49    |
|                                          |                                            | 10-19  | 28        | 32.5       | 0.6            | 0.9(0.6-1.3)  | 49        | 35.9       | 0.9           | 1.4(1.0-1.9)  | 0.076   |
|                                          |                                            | 20-29  | 24        | 20.1       | 0.8            | 1.2(0.8-1.8)  | 22        | 21.5       | 0.7           | 1.0(0.7-1.6)  | 0.60    |
|                                          |                                            | 30+    | 14        | 8.1        | 1.3            | 1.7(1.0-2.9)  | 11        | 8.8        | 0.9           | 1.3(0.7-2.3)  | 0.43    |
|                                          | Current age, y                             | 05-19  | NA        | NA         | NA             | NA            | 16        | 15.5       | 0.4           | 1.0(0.5-1.9)  | NA      |
|                                          |                                            | 20-29  | 31        | 31.8       | 0.7            | 1.0(0.7-1.4)  | 45        | 37.5       | 0.9           | 1.2(0.9-1.6)  | 0.44    |
|                                          |                                            | 30-39  | 29        | 28.8       | 0.7            | 1.0(0.7-1.5)  | 24        | 19.6       | 0.8           | 1.2(0.8-1.8)  | 0.50    |
|                                          |                                            | 40+    | 30        | 22.3       | 0.9            | 1.3(0.9-1.9)  | 11        | 8.7        | 0.9           | 1.3(0.7-2.3)  | 0.86    |
| Recurrence/progression of primary cancer | Among all patients                         |        | 492       | NA         | NA             |               | 325       | NA         | NA            |               | NA      |
|                                          | Sex                                        | Female | 193       | NA         | NA             |               | 132       | NA         | NA            |               | NA      |
|                                          |                                            | Male   | 298       | NA         | NA             |               | 193       | NA         | NA            |               | NA      |
|                                          | Survival after diagnosis, y                | 05-9   | 313       | NA         | NA             |               | 175       | NA         | NA            |               | NA      |
|                                          |                                            | 10-19  | 130       | NA         | NA             |               | 110       | NA         | NA            |               | NA      |

| Cause of death | Group                       | Level               | early-AYA |            |                |              | Childhood |            |               |              | p-value |
|----------------|-----------------------------|---------------------|-----------|------------|----------------|--------------|-----------|------------|---------------|--------------|---------|
|                |                             |                     | # deaths  | # expected | Rate / 1000 PY | SMR (95% CI) | # deaths  | # expected | Rate/ 1000 PY | SMR (95% CI) |         |
|                |                             | 20-29               | 37        | NA         | NA             |              | 29        | NA         | NA            |              | NA      |
|                |                             | 30+                 | 11        | NA         | NA             |              | 10        | NA         | NA            |              | NA      |
|                | Current age, y              | 05-19               | NA        | NA         | NA             |              | 162       | NA         | NA            |              | NA      |
|                |                             | 20-29               | 360       | NA         | NA             |              | 118       | NA         | NA            |              | NA      |
|                |                             | 30-39               | 91        | NA         | NA             |              | 32        | NA         | NA            |              | NA      |
|                |                             | 40+                 | 40        | NA         | NA             |              | 13        | NA         | NA            |              | NA      |
| Unknown        | Among all patients          |                     | 63        | NA         | NA             |              | 37        | NA         | NA            |              | NA      |
|                | Sex                         | Female              | 27        | NA         | NA             |              | 14        | NA         | NA            |              | NA      |
|                |                             | Male                | 36        | NA         | NA             |              | 23        | NA         | NA            |              | NA      |
|                | Survival after diagnosis, y | 05-9                | 31        | NA         | NA             |              | 12        | NA         | NA            |              | NA      |
|                |                             | 10-19               | 20        | NA         | NA             |              | 15        | NA         | NA            |              | NA      |
|                |                             | 20-29               | 10        | NA         | NA             |              | 9         | NA         | NA            |              | NA      |
|                |                             | 30+                 | 2         | NA         | NA             |              | 1         | NA         | NA            |              | NA      |
|                | Current age, y              | 05-19               | NA        | NA         | NA             |              | 13        | NA         | NA            |              | NA      |
|                |                             | 20-29               | 37        | NA         | NA             |              | 13        | NA         | NA            |              | NA      |
|                |                             | 30-39               | 18        | NA         | NA             |              | 9         | NA         | NA            |              | NA      |
|                |                             | 40+                 | 8         | NA         | NA             |              | 2         | NA         | NA            |              | NA      |
|                | Primary diagnosis           | Bone cancer         | 8         | NA         | NA             |              | 4         | NA         | NA            |              | NA      |
|                |                             | CNS                 | 9         | NA         | NA             |              | 4         | NA         | NA            |              | NA      |
|                |                             | HL                  | 23        | NA         | NA             |              | 20        | NA         | NA            |              | NA      |
|                |                             | Leukemia            | 13        | NA         | NA             |              | 6         | NA         | NA            |              | NA      |
|                |                             | NHL                 | 4         | NA         | NA             |              | 1         | NA         | NA            |              | NA      |
|                |                             | Soft tissue sarcoma | 6         | NA         | NA             |              | 2         | NA         | NA            |              | NA      |

Abbreviations: y, year; PY, person-year; SMR, standardized mortality ratio; CI, confidence interval; CNS, central nervous system; HL, Hodgkin lymphoma; NHL, non-Hodgkin lymphoma; NA, not applicable.

\*Kidney and Neuroblastoma not included due to low # of early-AYA survivors with these diagnoses.

# and % include weighting, e.g. 1357 deaths after weighting.

\$ Other medical causes: Nonrecurrent, health-related causes of death other than subsequent malignant neoplasms, cardiac causes, or pulmonary causes.

**Supplemental Figure 3. Standardized mortality ratios for nonrecurrent, health-related cause of death in survivors of early-AYA and**

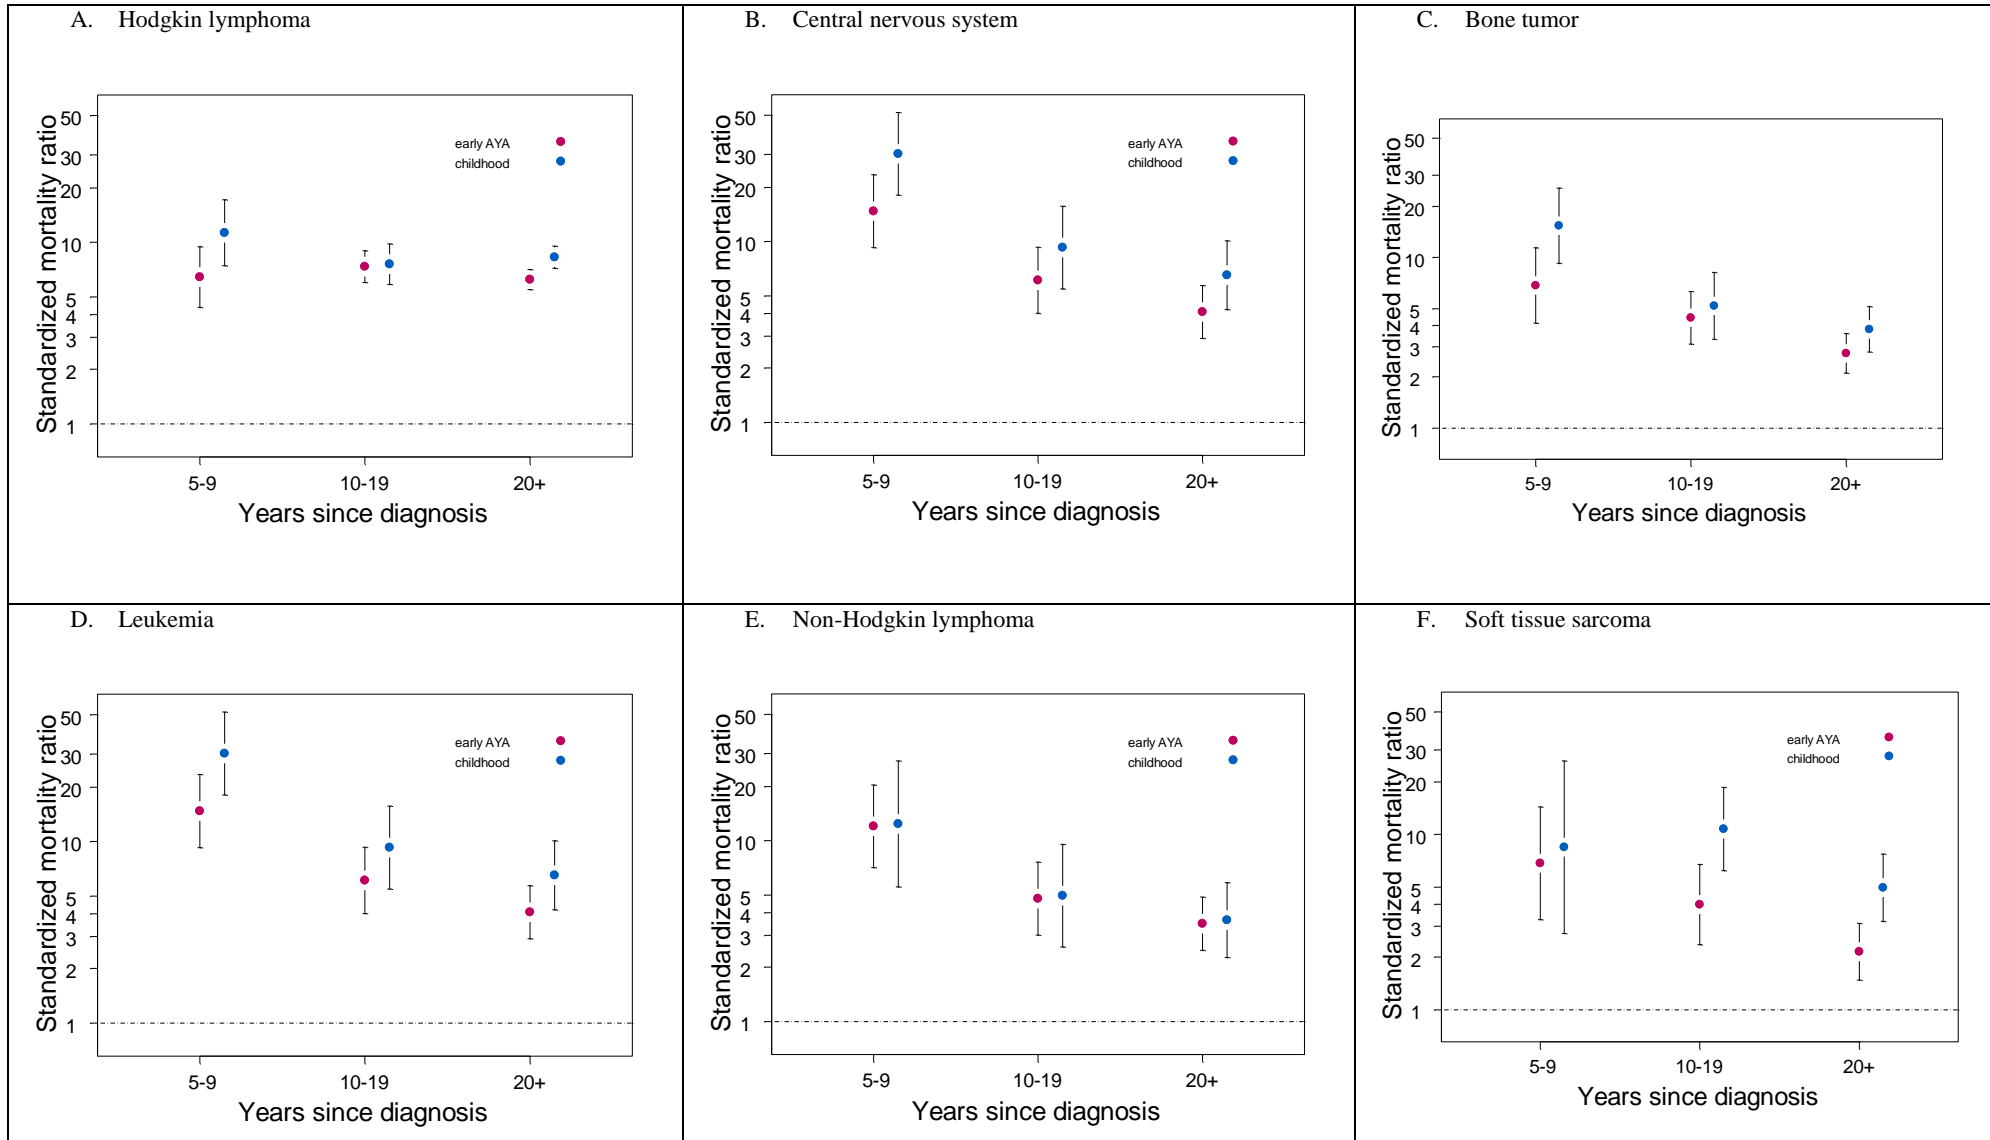

**matched childhood cancer survivors as a function of time since diagnosis and by original cancer diagnosis.**

Abbreviation: p, p-value comparing SMR for early-AYA and childhood cancer survivors for each time group.

**Supplemental Table 3. Risk of death due to recurrence/progression of primary cancer among survivors of early-AYA cancer compared to childhood cancer survivors, by cancer diagnosis.**

| <b>Diagnosis</b>    | <b>HR<br/>(95 % CI)</b> | <b>p-value</b> | <b># deaths-<br/>early-<br/>AYA<br/>survivors</b> | <b># deaths-<br/>childhood<br/>cancer<br/>survivors</b> |
|---------------------|-------------------------|----------------|---------------------------------------------------|---------------------------------------------------------|
| All diagnoses       | 1.6 (1.4-1.9)           | <0.0001        | 492                                               | 325                                                     |
| Leukemia            | 1.9 (1.4-2.6)           | 0.0001         | 86                                                | 64                                                      |
| CNS                 | 1.5 (1.0-2.1)           | 0.0356         | 72                                                | 51                                                      |
| Hodgkin lymphoma    | 2.5 (1.9-3.4)           | <0.0001        | 152                                               | 67                                                      |
| NHL                 | 1.6 (0.6-4.1)           | 0.3532         | 11                                                | 7                                                       |
| Soft tissue sarcoma | 1.3 (0.8-2.0)           | 0.2255         | 46                                                | 35                                                      |
| Bone cancer         | 1.1 (0.8-1.4)           | 0.7032         | 109                                               | 100                                                     |

-Each row represents a separate Cox model with time since diagnosis as scale, adjusted for sex, and censored at 31DEC2013.

- Abbreviations: HR, hazard ratio; CI, confidence interval; CNS, central nervous system; NHL, non-Hodgkin lymphoma.



**Supplemental Table 4. Multivariate hazard ratios and 95% CI for development of organ system grade 3-5 conditions within the early-AYA survivor population following specific therapeutic exposures for the primary cancer.**

| Organ system                                      | Treatment                                         | HR (95 % CI)                     | p-value       |        |
|---------------------------------------------------|---------------------------------------------------|----------------------------------|---------------|--------|
| SMN                                               | Any radiation vs. none                            | 2.2 (1.6-2.9)                    | <0.0001       |        |
|                                                   | Anti-metabolites <sup>1</sup> vs. none            | 0.8 (0.6-1.1)                    | 0.1847        |        |
|                                                   | Platinum drugs vs. none                           | 2.1 (1.3-3.3)                    | 0.0019        |        |
|                                                   | Plant alkaloid <sup>2</sup> vs. none              | 0.8 (0.6-1.1)                    | 0.1453        |        |
|                                                   | CED: 1 - <4000 mg/m <sup>2</sup> vs. none         | 0.9 (0.5-1.5)                    | 0.6819        |        |
|                                                   | CED: 4000 - <8000 mg/m <sup>2</sup> vs. none      | 1.2 (0.8-1.8)                    | 0.4014        |        |
|                                                   | CED: ≥ 8000+ mg/m <sup>2</sup> vs. none           | 1.6 (1.1-2.3)                    | 0.0091        |        |
|                                                   | Anthracycline: 1 - 299 mg/m <sup>2</sup> vs. none | 1.1 (0.8-1.6)                    | 0.4012        |        |
|                                                   | Anthracycline: ≥ 300 mg/m <sup>2</sup> vs. none   | 1.0 (0.7-1.4)                    | 0.8294        |        |
|                                                   | Female vs. male                                   | 2.4 (1.9-3.0)                    | <0.0001       |        |
|                                                   | Hispanic or non-white race vs. white non-Hispanic | 1.1 (0.8-1.5)                    | 0.5367        |        |
|                                                   |                                                   |                                  |               |        |
|                                                   | Cardiac                                           | Chest RT: 0.1 – 14.9 Gy vs. none | 0.9 (0.6-1.3) | 0.4793 |
| Chest RT: 15 – 34.9 Gy vs. none                   |                                                   | 1.8 (1.2-2.8)                    | 0.0046        |        |
| Chest RT: ≥ 35 Gy vs. none                        |                                                   | 3.3 (2.4-4.6)                    | <0.0001       |        |
| Bleomycin vs. none                                |                                                   | 1.3 (0.9-1.8)                    | 0.1910        |        |
| Platinum drugs vs. none                           |                                                   | 1.4 (0.9-2.2)                    | 0.1917        |        |
| Plant alkaloid <sup>2</sup> vs. none              |                                                   | 0.8 (0.6-1.2)                    | 0.3573        |        |
| CED: 1 - <4000 mg/m <sup>2</sup> vs. none         |                                                   | 1.4 (0.9-2.3)                    | 0.1607        |        |
| CED: 4000 - <8000 mg/m <sup>2</sup> vs. none      |                                                   | 1.2 (0.8-1.7)                    | 0.4610        |        |
| CED: ≥ 8000 mg/m <sup>2</sup> vs. none            |                                                   | 1.4 (1.0-2.0)                    | 0.0896        |        |
| Anthracycline: 1 - 299 mg/m <sup>2</sup> vs. none |                                                   | 1.0 (0.7-1.5)                    | 0.9421        |        |
| Anthracycline: ≥ 300 mg/m <sup>2</sup> vs. none   |                                                   | 1.2 (0.8-1.7)                    | 0.3878        |        |
| Female vs. male                                   |                                                   | 0.6 (0.5-0.7)                    | <0.0001       |        |
| Hispanic or non-white race vs. white non-Hispanic |                                                   | 1.1 (0.8-1.5)                    | 0.4727        |        |
| Ever smoked vs. never                             |                                                   | 1.0 (0.8-1.2)                    | 0.6454        |        |
|                                                   |                                                   |                                  |               |        |
| Endocrine                                         | Total body RT vs. no RT                           | 3.3(1.4-7.8)                     | <0.0067       |        |
|                                                   | Chest/neck RT vs. no RT                           | 3.9(2.6-5.7)                     | <0.0001       |        |
|                                                   | Abdominal RT vs. no RT                            | 1.2(0.4-3.5)                     | 0.7073        |        |
|                                                   | Central Nervous System RT vs. no RT               | 1.6(0.8-3.0)                     | 0.1918        |        |
|                                                   | Other RT vs. no RT                                | 1.9(1.0-3.8)                     | 0.0629        |        |

| <b>Organ system</b> | <b>Treatment</b>                                  | <b>HR (95 % CI)</b> | <b>p-value</b> |
|---------------------|---------------------------------------------------|---------------------|----------------|
|                     | CED: 1-<4000 mg/m <sup>2</sup> vs. none           | 1.3(0.8-2.0)        | 0.3521         |
|                     | CED: 4000-<8000 mg/m <sup>2</sup> vs. none        | 1.0(0.7-1.6)        | 0.8801         |
|                     | CED: ≥ 8000 mg/m <sup>2</sup> vs. none            | 1.0(0.7-1.4)        | 0.9912         |
|                     | Female vs. male                                   | 3.2(2.4-4.3)        | <0.0001        |
|                     | Hispanic or non-white race vs. white non-hispanic | 1.3(0.8-1.9)        | 0.2609         |
|                     |                                                   |                     |                |
| Pulmonary           | Chest RT: 0.1 – 14.9 Gy vs. none                  | 1.1 (0.4-2.8)       | 0.8434         |
|                     | Chest RT: 15 – 34.9 Gy vs. none                   | 1.6 (0.4- 5.7)      | 0.4790         |
|                     | Chest RT: ≥ 35 Gy vs. none                        | 3.1 (1.6- 6.2)      | 0.0013         |
|                     | Carmustine (BCNU) vs. none                        | 1.5 (0.4-5.2)       | 0.5179         |
|                     | Bleomycin vs. none                                | 1.2 (0.5-2.7)       | 0.7023         |
|                     | Cyclophosphamide vs. none                         | 1.5 (0.8-2.8)       | 0.1643         |
|                     | Female vs. male                                   | 1.2 (0.7-2.0)       | 0.6064         |
|                     | Hispanic or non-white race vs. white non-Hispanic | 0.7 (0.3-2.1)       | 0.5599         |
|                     | Ever smoked vs. never                             | 0.6 (0.3-1.2)       | 0.1458         |

Abbreviations: HR, hazard ratio; CI, cumulative incidence; SMN, subsequent malignant neoplasms; CED, cyclophosphamide equivalent dose; RT, radiation therapy.

Models for each organ system adjusted for all listed treatments/demographics in addition to time since diagnosis.

<sup>1</sup>Anti-metabolites include Ara-A, 5-Azacytidine, Cytosine Arabinoside, 5-FU, Fludarabine, 6-Mercaptopurine, Methotrexate, 6-Thioguanine.

<sup>2</sup>Plant alkaloids include Vinblastine and Vincristine.

**Supplemental Figure 4: Hazard ratios and 95% CI of grade 3-5 chronic health conditions among early-AYA survivors, according to tumor type, compared to siblings. (a) All Grade 3-5 Conditions, (b) Cardiac, (c) Endocrine, and (d) Pulmonary.**

**a) Grade 3-5 conditions**

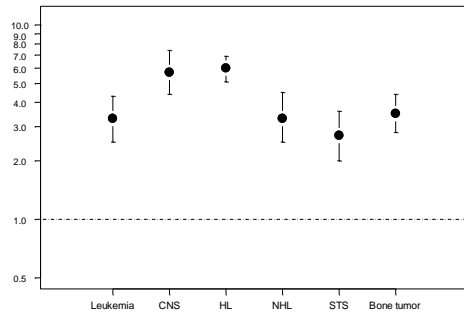

**b) Cardiac**

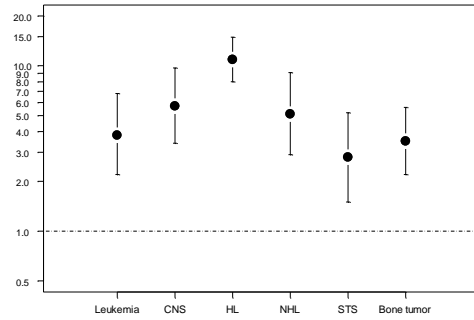

**c) Endocrine**

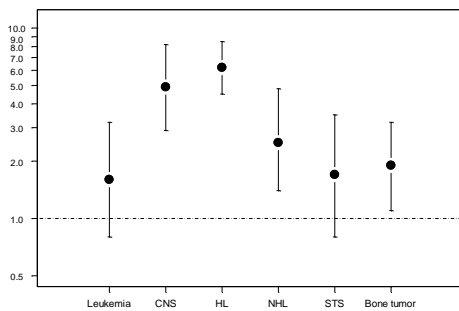

**d) Pulmonary**

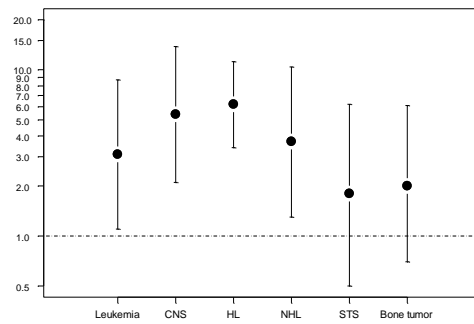

Y-axis presented with log scale in order to have symmetric confidence intervals.

Each combination of condition with diagnosis represents the results of a separate model adjusted for sex and race.

Abbreviations: CNS, central nervous system; HL, Hodgkin lymphoma; NHL, non-Hodgkin lymphoma; STS, soft tissue sarcoma.

**Supplemental Table 5. Standardized incidence ratios of Subsequent Malignant Neoplasms among survivors of early-AYA and matched childhood cancer.**

| Subsequent Malignant Neoplasm | Original Cancer Diagnosis              | Group                       | Level                                      | early-AYA  |              |      |              | childhood  |              |      |                 | p-value |
|-------------------------------|----------------------------------------|-----------------------------|--------------------------------------------|------------|--------------|------|--------------|------------|--------------|------|-----------------|---------|
|                               |                                        |                             |                                            | # observed | # expected   | Rate | SIR (95% CI) | # observed | # expected   | Rate | SIR (95% CI)    |         |
| All SMNs                      | All survivors                          | Overall                     |                                            | 336        | 70.7         | 5.2  | 4.7(4.2-5.3) | 254        | 37.0         | 3.7  | 6.9(6.0-7.8)    | <0.0001 |
|                               |                                        | Current age, y              | 05-19                                      | NA         | NA           | NA   |              | 55         | 4.2          | 2.3  | 13.3(9.7-18.1)  | NA      |
|                               |                                        |                             | 20-29                                      | 73         | 14.0         | 2.5  | 5.2(4.0-6.6) | 83         | 13.4         | 2.8  | 6.2(5.0-7.7)    | 0.28    |
|                               |                                        |                             | 30-39                                      | 143        | 27.6         | 5.5  | 5.2(4.4-6.2) | 92         | 13.3         | 7.2  | 6.9(5.6-8.6)    | 0.04    |
|                               |                                        |                             | 40+                                        | 120        | 29.1         | 11.9 | 4.1(3.4-5.0) | 24         | 6.2          | 9.7  | 3.8(2.5-5.8)    | 0.76    |
|                               |                                        | Survival after diagnosis, y | 05-9                                       | 59         | 10.9         | 2.9  | 5.4(4.1-7.2) | 63         | 5.3          | 2.9  | 11.9(9.0-15.8)  | <0.001  |
|                               |                                        |                             | 10-19                                      | 136        | 28.2         | 4.4  | 4.8(4.1-5.7) | 103        | 15.0         | 3.1  | 6.9(5.6-8.4)    | 0.0086  |
|                               |                                        |                             | 20-29                                      | 121        | 24.5         | 10.0 | 4.9(4.1-5.9) | 76         | 12.7         | 6.1  | 6.0(4.7-7.5)    | 0.21    |
|                               |                                        |                             | 30+                                        | 19         | 7.1          | 12.6 | 2.7(1.7-4.2) | 12         | 3.9          | 6.9  | 3.0(1.7-5.4)    | 0.74    |
|                               |                                        |                             | 5-9 y after diagnosis, current age 5-19    | NA         | NA           | NA   | NA           | 38         | 2.4          | 2.6  | 16.1(11.0-23.5) | NA      |
|                               |                                        |                             | 10-19 y after diagnosis, current age 5-19  | NA         | NA           | NA   | NA           | 17         | 1.8          | 1.8  | 9.6(5.7-16.2)   | NA      |
|                               |                                        |                             | 5-9 y after diagnosis, current age 20-39   | 41         | 8.0          | 2.2  | 5.2(3.7-7.1) | 9          | 1.8          | 1.8  | 5.1(2.7-9.8)    | 0.99    |
|                               |                                        |                             | 10-19 y after diagnosis, current age 20-39 | 136        | 26.5         | 4.4  | 5.1(4.3-6.1) | 89         | 12.6         | 3.6  | 7.0(5.7-8.7)    | 0.03    |
|                               |                                        |                             | 20+ y after diagnosis, current age 20-39   | 38         | 7.1          | 7.1  | 5.4(3.8-7.4) | 77         | 12.2         | 5.8  | 6.3(5.0-8.0)    | 0.43    |
|                               | 20+ y after diagnosis, current age 40+ | 120                         | 29.0                                       | 12.0       | 4.1(3.5-5.0) | 24   | 6.2          | 9.7        | 3.8(2.5-5.8) | 0.75 |                 |         |
|                               | Bone survivors                         | Overall                     |                                            | 57         | 12.8         | 4.7  | 4.4(3.3-6.0) | 36         | 7.7          | 3.0  | 4.7(3.3-6.6)    | 0.82    |
|                               | CNS survivors                          | Overall                     |                                            | 17         | 5.9          | 2.7  | 2.9(1.8-4.6) | 12         | 2.6          | 1.8  | 4.7(2.5-8.6)    | 0.22    |

| Subsequent Malignant Neoplasm | Original Cancer Diagnosis | Group                                      | Level | early-AYA  |            |      |                | childhood  |            |      |                  | p-value |
|-------------------------------|---------------------------|--------------------------------------------|-------|------------|------------|------|----------------|------------|------------|------|------------------|---------|
|                               |                           |                                            |       | # observed | # expected | Rate | SIR (95% CI)   | # observed | # expected | Rate | SIR (95% CI)     |         |
|                               | HL survivors              | Overall                                    |       | 197        | 28.7       | 8.3  | 6.9(6.0-7.9)   | 145        | 15.7       | 5.9  | 9.2(7.8-10.9)    | 0.0087  |
|                               | Leukemia survivors        | Overall                                    |       | 21         | 8.9        | 2.1  | 2.3(1.5-3.7)   | 24         | 4.6        | 1.8  | 5.2(3.1-8.8)     | 0.021   |
|                               | NHL survivors             | Overall                                    |       | 27         | 6.5        | 4.1  | 4.1(2.8-6.2)   | 13         | 3.1        | 2.0  | 4.2(2.4-7.4)     | 0.97    |
|                               | STS survivors             | Overall                                    |       | 16         | 7.3        | 2.7  | 2.2(1.4-3.5)   | 24         | 3.1        | 4.1  | 7.6(4.9-11.9)    | <0.001  |
| Bone tumors                   | All survivors             | Overall                                    |       | 5          | 0.4        | 0.1  | 11.2(4.7-26.9) | 18         | 0.7        | 0.3  | 27.4(17.2-43.5)  | 0.077   |
| CNS                           | All survivors             | Overall                                    |       | 11         | 2.3        | 0.2  | 4.9(2.7-8.9)   | 18         | 2.0        | 0.3  | 8.8(4.9-15.6)    | 0.17    |
| Leukemia                      | All survivors             | Overall                                    |       | 15         | 2.1        | 0.2  | 7.1(4.3-11.8)  | 11         | 1.9        | 0.2  | 5.8(3.2-10.4)    | 0.61    |
| Lymphoma                      | All survivors             | Overall                                    |       | 20         | 7.3        | 0.3  | 2.7(1.7-4.5)   | 8          | 5.3        | 0.1  | 1.5(0.7-3.3)     | 0.21    |
| Soft tissue sarcoma           | All survivors             | Overall                                    |       | 20         | 4.0        | 0.3  | 5.0(3.3-7.8)   | 29         | 2.3        | 0.4  | 12.6(8.5-18.5)   | 0.0022  |
|                               |                           | Current age , y                            | 05-19 | NA         | NA         | NA   | NA             | 11         | 0.3        | 0.5  | 32.4(16.2-64.5)  | NA      |
|                               |                           |                                            | 20-29 | 5          | 1.2        | 0.2  | 4.3(1.8-10.2)  | 12         | 1.0        | 0.4  | 11.9(6.8-21.0)   | 0.053   |
|                               |                           |                                            | 30+   | 15         | 2.8        | 0.4  | 5.4(3.2-8.9)   | 6          | 1.0        | 0.4  | 6.2(2.8-13.8)    | 0.76    |
|                               |                           | Survival after diagnosis, y                | 05-9  | 6          | 0.8        | 0.3  | 7.8(3.5-17.3)  | 9          | 0.4        | 0.4  | 24.2(12.6-46.5)  | 0.031   |
|                               |                           |                                            | 10-19 | 6          | 2.2        | 0.2  | 2.7(1.2-6.0)   | 15         | 1.2        | 0.5  | 12.9(7.8-21.4)   | 0.0011  |
|                               |                           |                                            | 20+   | 8          | 1.0        | 0.6  | 8.3(4.2-16.7)  | 5          | 0.8        | 0.4  | 6.5(2.7-15.6)    | 0.66    |
|                               |                           | 5-9 y after diagnosis, current age 5-19    |       | NA         | NA         | NA   | NA             | 4          | 0.2        | 0.3  | 20.6(7.7-54.9)   | NA      |
|                               |                           | 10-19 y after diagnosis, current age 5-19  |       | NA         | NA         | NA   | NA             | 7          | 0.1        | 0.7  | 48.0(19.0-121.5) | NA      |
|                               |                           | 5-9 y after diagnosis, current age 20-39   |       | 4          | 0.6        | 0.2  | 6.2(2.3-16.4)  | 2          | 0.1        | 0.4  | 17.0(4.2-67.9)   | 0.24    |
|                               |                           | 10-19 y after diagnosis, current age 20-39 |       | 5          | 2.2        | 0.2  | 2.2(0.9-5.4)   | 9          | 1.0        | 0.4  | 9.0(4.7-17.3)    | 0.01    |

| Subsequent Malignant Neoplasm | Original Cancer Diagnosis | Group                                      | Level | early-AYA  |            |      |                 | childhood  |            |      |                  | p-value |
|-------------------------------|---------------------------|--------------------------------------------|-------|------------|------------|------|-----------------|------------|------------|------|------------------|---------|
|                               |                           |                                            |       | # observed | # expected | Rate | SIR (95% CI)    | # observed | # expected | Rate | SIR (95% CI)     |         |
|                               |                           | 20+ y after diagnosis, current age 20-39   |       | 1          | 0.4        | 0.2  | 2.5(0.4-17.9)   | 5          | 0.7        | 0.4  | 7.1(3.0-17.2)    | 0.34    |
|                               |                           | 20+ y after diagnosis, current age 40+     |       | 10         | 0.7        | 1.0  | 14.6(7.9-27.1)  | 2          | 0.2        | 0.8  | 13.3(3.4-52.8)   | 0.90    |
| Breast                        | All survivors, females    | Overall                                    |       | 139        | 13.6       | 4.5  | 10.2(8.6-12.2)  | 56         | 4.7        | 1.8  | 11.8(8.9-15.8)   | 0.40    |
|                               |                           | Current age, y                             | 05-19 | NA         | NA         | NA   | NA              | 1          | 0.01       | 0.1  | 96.2(13.5-682.8) | NA      |
|                               |                           |                                            | 20-29 | 15         | 0.8        | 1.1  | 19.4(10.7-35.2) | 10         | 0.6        | 0.7  | 17.1(9.2-31.8)   | 0.78    |
|                               |                           |                                            | 30-39 | 64         | 5.1        | 5.2  | 12.5(9.6-16.3)  | 32         | 2.4        | 5.3  | 13.4(9.0-19.8)   | 0.77    |
|                               |                           |                                            | 40+   | 60         | 7.7        | 12.1 | 7.8(6.0-10.1)   | 13         | 1.8        | 10.5 | 7.4(4.2-13.0)    | 0.87    |
|                               |                           | Survival after diagnosis, y                | 05-9  | 16         | 1.2        | 1.6  | 13.8(7.8-24.4)  | 7          | 0.2        | 0.7  | 29.5(14.4-60.4)  | 0.10    |
|                               |                           |                                            | 10-19 | 54         | 4.7        | 3.7  | 11.4(8.7-15.0)  | 19         | 1.1        | 1.3  | 17.3(10.7-28.2)  | 0.14    |
|                               |                           |                                            | 20-29 | 59         | 6.3        | 10.6 | 9.4(7.2-12.3)   | 22         | 2.4        | 3.9  | 9.2(5.9-14.2)    | 0.92    |
|                               |                           |                                            | 30+   | 10         | 1.4        | 15.1 | 7.0(3.8-13.1)   | 8          | 1.0        | 9.9  | 7.9(3.9-15.8)    | 0.81    |
|                               |                           | 5-9 y after diagnosis, current age 5-19    |       | NA         | NA         | NA   | NA              | 1          | 0.0        | 0.2  | NA               | NA      |
|                               |                           | 10-19 y after diagnosis, current age 5-19  |       | NA         | NA         | NA   | NA              | 0          | 0.0        | NA   | NA               | NA      |
|                               |                           | 5-9 y after diagnosis, current age 20-39   |       | 5          | 0.4        | 0.6  | 13.1(5.5-31.6)  | 0          | 0.0        | NA   | NA               | NA      |
|                               |                           | 10-19 y after diagnosis, current age 20-39 |       | 57         | 3.9        | 3.9  | 14.4(10.9-19.1) | 20         | 0.9        | 1.8  | 22.5(13.7-36.8)  | 0.13    |
|                               |                           | 20+ y after diagnosis, current age 20-39   |       | 17         | 1.6        | 6.7  | 10.8(6.6-17.7)  | 22         | 2.1        | 3.6  | 10.7(6.8-16.8)   | 0.98    |
|                               |                           | 20+ y after diagnosis, current age 40+     |       | 60         | 7.6        | 12.1 | 7.8(6.1-10.2)   | 13         | 1.8        | 10.5 | 7.4(4.2-13.0)    | 0.86    |

| Subsequent Malignant Neoplasm | Original Cancer Diagnosis                     | Group                       | Level | early-AYA  |            |      |                 | childhood  |            |      |                   | p-value |
|-------------------------------|-----------------------------------------------|-----------------------------|-------|------------|------------|------|-----------------|------------|------------|------|-------------------|---------|
|                               |                                               |                             |       | # observed | # expected | Rate | SIR (95% CI)    | # observed | # expected | Rate | SIR (95% CI)      |         |
|                               | HL survivors, females                         | Overall                     |       | 97         | 6.4        | 7.4  | 15.2(12.4-18.6) | 39         | 2.2        | 3.9  | 17.4(12.3-24.6)   | 0.51    |
|                               |                                               | Current age, y              | 05-19 | NA         | NA         | NA   | NA              | 0          | 0.002      | 0.0  | NA                | NA      |
|                               |                                               |                             | 20-29 | 8          | 0.3        | 1.5  | 25.1(11.6-54.3) | 6          | 0.2        | 1.2  | 27.1(12.3-60.1)   | 0.89    |
|                               |                                               |                             | 30-39 | 46         | 2.2        | 8.7  | 20.8(15.2-28.3) | 25         | 1.1        | 9.3  | 23.3(15.0-36.0)   | 0.68    |
|                               |                                               |                             | 40+   | 43         | 3.8        | 17.6 | 11.2(8.3-15.1)  | 8          | 0.9        | 12.0 | 8.5(4.4-16.5)     | 0.46    |
|                               |                                               | Survival after diagnosis, y | 05-9  | 7          | 0.7        | 1.6  | 10.1(4.8-21.2)  | 3          | 0.2        | 1.0  | 19.0(6.2-58.8)    | 0.36    |
|                               |                                               |                             | 10-19 | 39         | 2.3        | 6.3  | 17.0(12.3-23.6) | 15         | 0.6        | 3.2  | 27.1(15.5-47.4)   | 0.16    |
|                               |                                               |                             | 20-29 | 42         | 2.7        | 18.1 | 15.5(11.2-21.4) | 16         | 1.0        | 8.4  | 15.3(9.1-25.8)    | 0.96    |
|                               |                                               |                             | 30+   | 9          | 0.7        | 28.4 | 13.1(6.7-25.4)  | 5          | 0.5        | 14.7 | 10.4(4.2-25.3)    | 0.68    |
|                               | Survivors of diagnosis other than HL, females | Overall                     |       | 42         | 7.2        | 2.4  | 5.8(4.2-8.2)    | 17         | 2.5        | 0.8  | 6.8(4.1-11.4)     | 0.62    |
|                               |                                               | Current age, y              | 05-19 | NA         | NA         | NA   | NA              | 1          | 0.01       | 0.1  | 119.0(16.8-845.3) | NA      |
|                               |                                               |                             | 20-29 | 7          | 0.5        | 0.8  | 15.4(6.1-38.8)  | 4          | 0.4        | 0.5  | 11.0(4.1-29.4)    | 0.63    |
|                               |                                               |                             | 30-39 | 18         | 2.9        | 2.5  | 6.2(3.7-10.2)   | 7          | 1.3        | 2.1  | 5.3(2.3-12.3)     | 0.76    |
|                               |                                               |                             | 40+   | 17         | 3.8        | 6.7  | 4.4(2.7-7.3)    | 5          | 0.8        | 8.7  | 6.2(2.2-16.9)     | 0.56    |
|                               |                                               | Survival after diagnosis, y | 05-9  | 9          | 0.5        | 1.6  | 19.3(8.4-43.9)  | 4          | 0.1        | 0.6  | 50.2(21.0-120.4)  | 0.12    |
|                               |                                               |                             | 10-19 | 15         | 2.5        | 1.8  | 6.1(3.7-10.0)   | 4          | 0.5        | 0.4  | 7.4(2.8-19.4)     | 0.74    |
|                               |                                               |                             | 20-29 | 17         | 3.6        | 5.2  | 4.8(3.0-7.7)    | 6          | 1.3        | 1.6  | 4.5(2.0-10.0)     | 0.88    |
|                               |                                               |                             | 30+   | 1          | 0.7        | 2.9  | 1.4(0.2-9.7)    | 3          | 0.5        | 6.5  | 5.7(1.9-17.3)     | 0.22    |
| Thyroid                       | All survivors                                 | Overall                     |       | 28         | 5.7        | 0.4  | 4.9(3.4-7.1)    | 68         | 3.7        | 1.0  | 18.4(14.5-23.2)   | <0.0001 |
|                               |                                               | Current age, y              | 05-19 | NA         | NA         | NA   | NA              | 11         | 0.3        | 0.5  | 41.0(22.7-74.0)   | NA      |
|                               |                                               |                             | 20-29 | 6          | 1.6        | 0.2  | 3.7(1.7-8.3)    | 20         | 1.6        | 0.7  | 12.3(7.9-19.0)    | 0.010   |
|                               |                                               |                             | 30-39 | 17         | 2.6        | 0.7  | 6.5(4.0-10.4)   | 35         | 1.4        | 2.7  | 24.9(17.9-34.6)   | <0.0001 |

| Subsequent Malignant Neoplasm | Original Cancer Diagnosis | Group                                      | Level | early-AYA  |            |      |               | childhood  |            |      |                   | p-value |
|-------------------------------|---------------------------|--------------------------------------------|-------|------------|------------|------|---------------|------------|------------|------|-------------------|---------|
|                               |                           |                                            |       | # observed | # expected | Rate | SIR (95% CI)  | # observed | # expected | Rate | SIR (95% CI)      |         |
|                               |                           |                                            | 40+   | 5          | 1.5        | 0.5  | 3.3(1.4-8.0)  | 2          | 0.4        | 0.8  | 5.0(1.2-19.9)     | 0.64    |
|                               |                           | Survival after diagnosis, y                | 05-9  | 4          | 1.1        | 0.2  | 3.6(1.3-9.5)  | 14         | 0.5        | 0.6  | 30.7(18.2-51.8)   | <0.001  |
|                               |                           |                                            | 10-19 | 17         | 2.8        | 0.6  | 6.2(3.8-9.9)  | 28         | 1.7        | 0.8  | 16.6(11.5-24.0)   | 0.0012  |
|                               |                           |                                            | 20-29 | 5          | 1.6        | 0.4  | 3.2(1.3-7.6)  | 24         | 1.3        | 1.9  | 18.6(12.5-27.9)   | <0.001  |
|                               |                           |                                            | 30+   | 2          | 0.3        | 1.3  | 7.6(1.9-30.4) | 2          | 0.3        | 1.1  | 7.2(1.8-29.0)     | 0.96    |
|                               |                           | 5-9 y after diagnosis, current age 5-19    |       | NA         | NA         | NA   | NA            | 9          | 0.1        | 0.6  | 67.6(35.2-129.8)  | NA      |
|                               |                           | 10-19 y after diagnosis, current age 5-19  |       | NA         | NA         | NA   | NA            | 2          | 0.1        | 0.2  | 14.8(3.7-59.2)    | NA      |
|                               |                           | 5-9 y after diagnosis, current age 20-39   |       | 4          | 0.9        | 0.2  | 4.5(1.7-12.0) | 1          | 0.2        | 0.2  | 4.8(0.7-34.3)     | 0.95    |
|                               |                           | 10-19 y after diagnosis, current age 20-39 |       | 16         | 2.7        | 0.5  | 6.0(3.7-9.7)  | 27         | 1.5        | 1.1  | 18.0(12.4-26.2)   | <0.001  |
|                               |                           | 20+ y after diagnosis, current age 20-39   |       | 3          | 0.7        | 0.6  | 4.6(1.5-14.2) | 27         | 1.3        | 2.0  | 20.3(14.0-29.6)   | 0.01    |
|                               |                           | 20+ y after diagnosis, current age 40+     |       | 5          | 1.5        | 0.5  | 3.4(1.4-8.1)  | 2          | 0.4        | 0.8  | 5.0(1.2-19.9)     | 0.64    |
|                               | HL survivors              | Overall                                    |       | 14         | 2.3        | 0.6  | 6.1(3.6-10.2) | 50         | 1.5        | 2.0  | 33.9(25.8-44.6)   | <0.0001 |
|                               |                           | Current age, y                             | 05-19 | NA         | NA         | NA   | NA            | 8          | 0.1        | 1.5  | 138.7(69.6-276.4) | NA      |
|                               |                           |                                            | 20-29 | 3          | 0.6        | 0.3  | 5.0(1.6-15.4) | 15         | 0.6        | 1.3  | 25.4(15.4-42.0)   | 0.0099  |
|                               |                           |                                            | 30-39 | 8          | 1.0        | 0.8  | 7.8(3.9-15.5) | 25         | 0.6        | 4.2  | 40.7(27.6-59.9)   | <0.0001 |
|                               |                           |                                            | 40+   | 3          | 0.7        | 0.7  | 4.4(1.4-13.7) | 2          | 0.2        | 1.5  | 9.4(2.3-37.9)     | 0.41    |
|                               |                           | Survival after diagnosis, y                | 05-9  | 1          | 0.5        | 0.1  | 2.1(0.3-14.8) | 10         | 0.2        | 1.3  | 47.0(25.3-87.4)   | 0.0030  |
|                               |                           |                                            | 10-19 | 10         | 1.1        | 0.9  | 9.0(4.9-16.8) | 23         | 0.7        | 2.0  | 34.7(23.2-51.8)   | <0.001  |
|                               |                           |                                            | 20-29 | 2          | 0.6        | 0.5  | 3.3(0.8-13.3) | 16         | 0.5        | 3.4  | 33.6(20.5-55.1)   | 0.0021  |
|                               |                           |                                            | 30+   | 1          | 0.1        | 1.5  | 8.5(1.2-59.1) | 1          | 0.1        | 1.3  | 8.2(1.1-58.4)     | 0.98    |



| Subsequent Malignant Neoplasm | Original Cancer Diagnosis            | Group                       | Level | early-AYA  |            |      |               | childhood  |            |      |                | p-value |
|-------------------------------|--------------------------------------|-----------------------------|-------|------------|------------|------|---------------|------------|------------|------|----------------|---------|
|                               |                                      |                             |       | # observed | # expected | Rate | SIR (95% CI)  | # observed | # expected | Rate | SIR (95% CI)   |         |
|                               | Survivors of diagnosis other than HL | Overall                     |       | 14         | 3.4        | 0.3  | 4.1(2.4-6.9)  | 18         | 2.2        | 0.4  | 8.1(5.1-12.8)  | 0.057   |
|                               |                                      | Current age, y              | 05-19 | NA         | NA         | NA   | NA            | 3          | 0.2        | 0.2  | 14.2(4.6-44.2) | NA      |
|                               |                                      |                             | 20-29 | 3          | 1.0        | 0.2  | 3.0(1.0-9.3)  | 5          | 1.0        | 0.3  | 4.8(2.0-11.6)  | 0.51    |
|                               |                                      |                             | 30-39 | 9          | 1.6        | 0.5  | 5.7(2.9-10.9) | 10         | 0.8        | 1.5  | 12.7(6.8-23.5) | 0.079   |
|                               |                                      |                             | 40+   | 2          | 0.8        | 0.3  | 2.4(0.6-9.8)  | NA         | 0.2        | NA   | NA             | NA      |
|                               |                                      | Survival after diagnosis, y | 05-9  | 3          | 0.6        | 0.2  | 4.7(1.5-14.4) | 4          | 0.2        | 0.3  | 16.5(6.2-43.8) | 0.097   |
|                               |                                      |                             | 10-19 | 7          | 1.7        | 0.4  | 4.2(2.0-8.9)  | 5          | 1.0        | 0.2  | 4.9(2.0-11.7)  | 0.80    |
|                               |                                      |                             | 20-29 | 3          | 1.0        | 0.4  | 3.1(1.0-9.6)  | 8          | 0.8        | 1.0  | 9.9(4.9-19.7)  | 0.087   |
|                               |                                      |                             | 30+   | 1          | 0.1        | 1.2  | 7.0(1.0-49.6) | 1          | 0.2        | 1.0  | 6.5(0.9-46.0)  | 0.96    |

Abbreviations: SMN, Subsequent Malignant Neoplasm; y, year; SIR, standardized incidence ratio; CI, confidence interval; CNS, central nervous system; HL, Hodgkin lymphoma; NHL, non-Hodgkin lymphoma; STS, soft tissue sarcoma; NA, not applicable.

## **Supplemental Methods: CCSS Institutions**

- 1) Children's Hospitals and Clinics of Minnesota, Minneapolis, MN
- 2) Children's Hospital of Colorado, Aurora CO
- 3) Children's Hospital of Los Angeles, Los Angeles, CA
- 4) Children's Hospital of Philadelphia, Philadelphia, PA
- 5) Children's Hospital of Pittsburgh, Pittsburgh, PA
- 6) Children's National Medical Center, Washington, DC
- 7) Dana Farber Cancer Institute/Children's Hospital, Boston, MA
- 8) Emory University/Children's Healthcare of Atlanta, Atlanta, GA
- 9) Mayo Clinic, Rochester, MN
- 10) Memorial Sloan Kettering Cancer Center, New York, NY
- 11) Nationwide Children's Hospital, Columbus, OH
- 12) Riley Hospital for Children, Indianapolis, IN
- 13) Roswell Park Cancer Institute, Buffalo, NY
- 14) St. Jude Children's Research Hospital, Memphis, TN
- 15) St. Louis Children's Hospital, St. Louis, MO
- 16) Seattle Children's Hospital, Seattle, WA
- 17) Stanford University School of Medicine, Palo Alto, CA
- 18) Texas Children's Hospital, Houston, TX
- 19) University of Alabama, Birmingham, AL
- 20) University of California Los Angeles, Los Angeles, CA
- 21) University of California San Francisco, San Francisco, CA
- 22) University of Michigan, Ann Arbor, MI
- 23) University of Minnesota, Minneapolis, MN
- 24) University of Texas MD Anderson Cancer Center, Houston, TX
- 25) University of Texas Southwestern Medical Center, Dallas, TX
- 26) Hospital for Sick Children, Toronto, Ontario, Canada
- 27) City of Hope National Medical Center, Duarte, CA
